# Supplementary figures and images for: Machine Learning Methods as a Tool for Predicting Risk of Illness Applying Next‐Generation Sequencing Data
Source: PubMed Central journal article supplement — Risk Anal. 2018 Nov 21;39(6):1397–413. doi: 10.1111/risa.13239 (PMC7379936; doi:10.1111/risa.13239), 2018-11-21

Legend

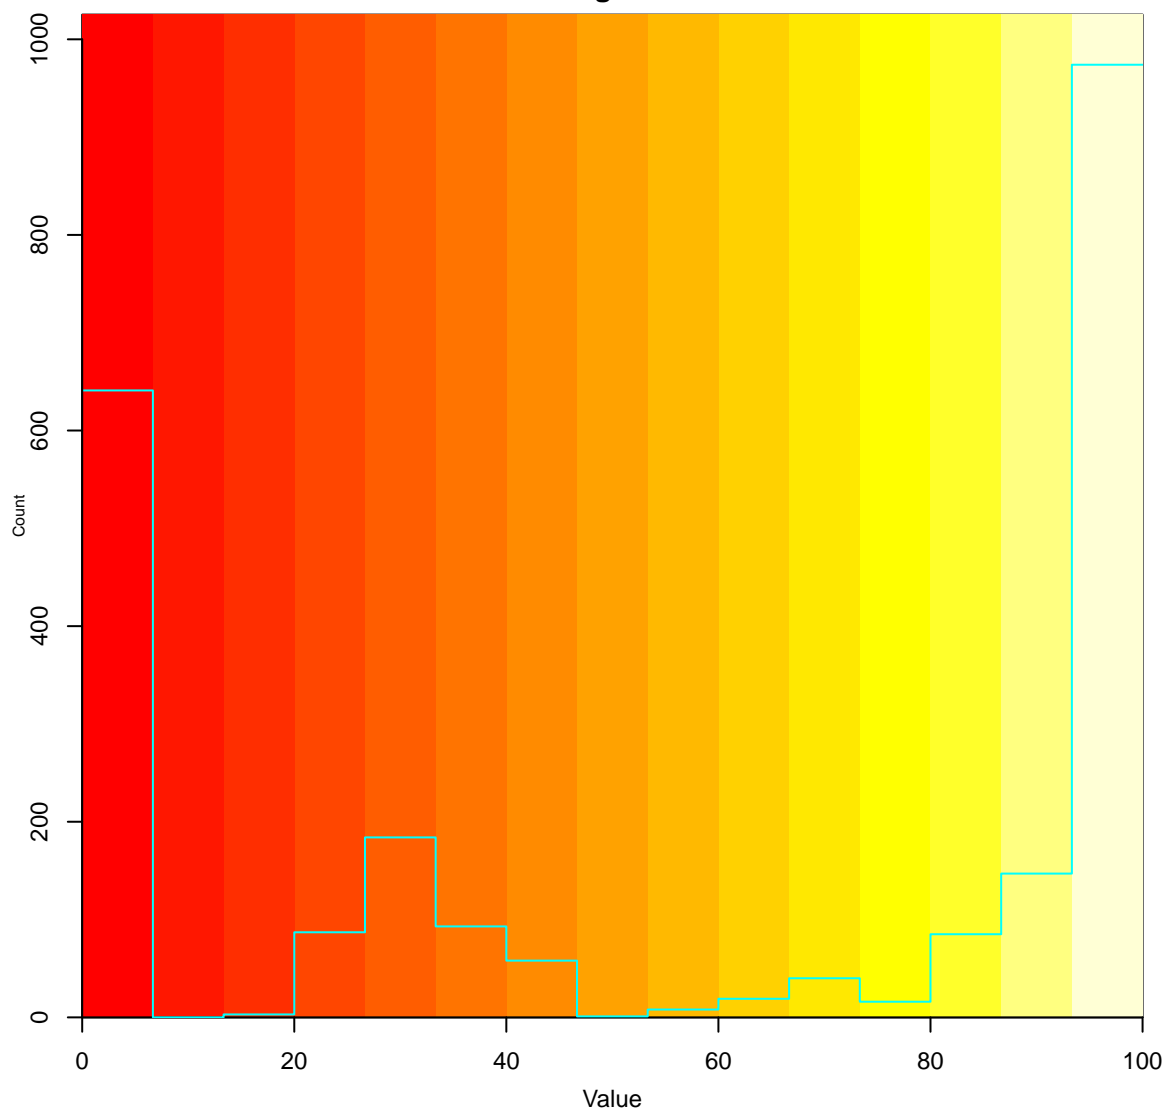

Clinical Panel

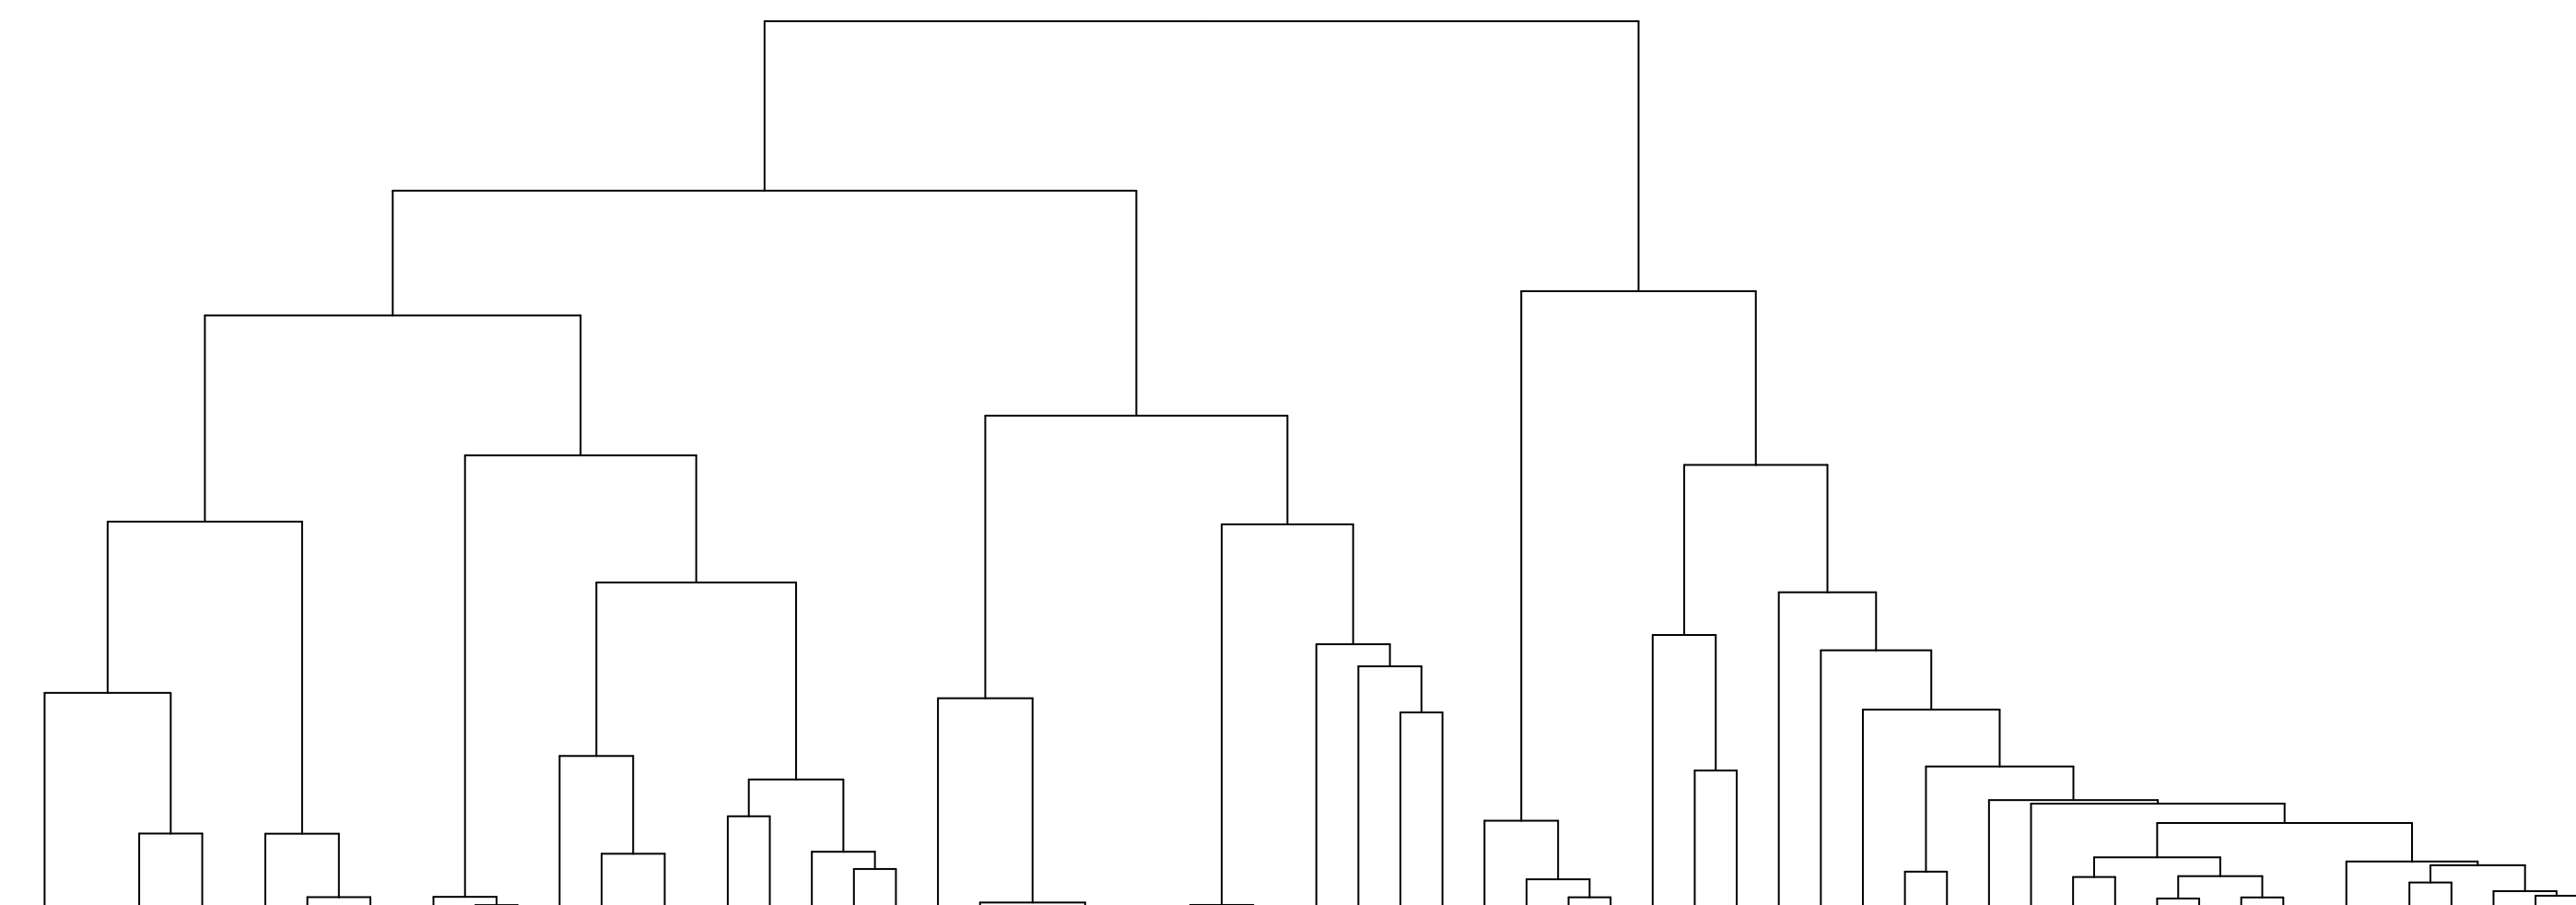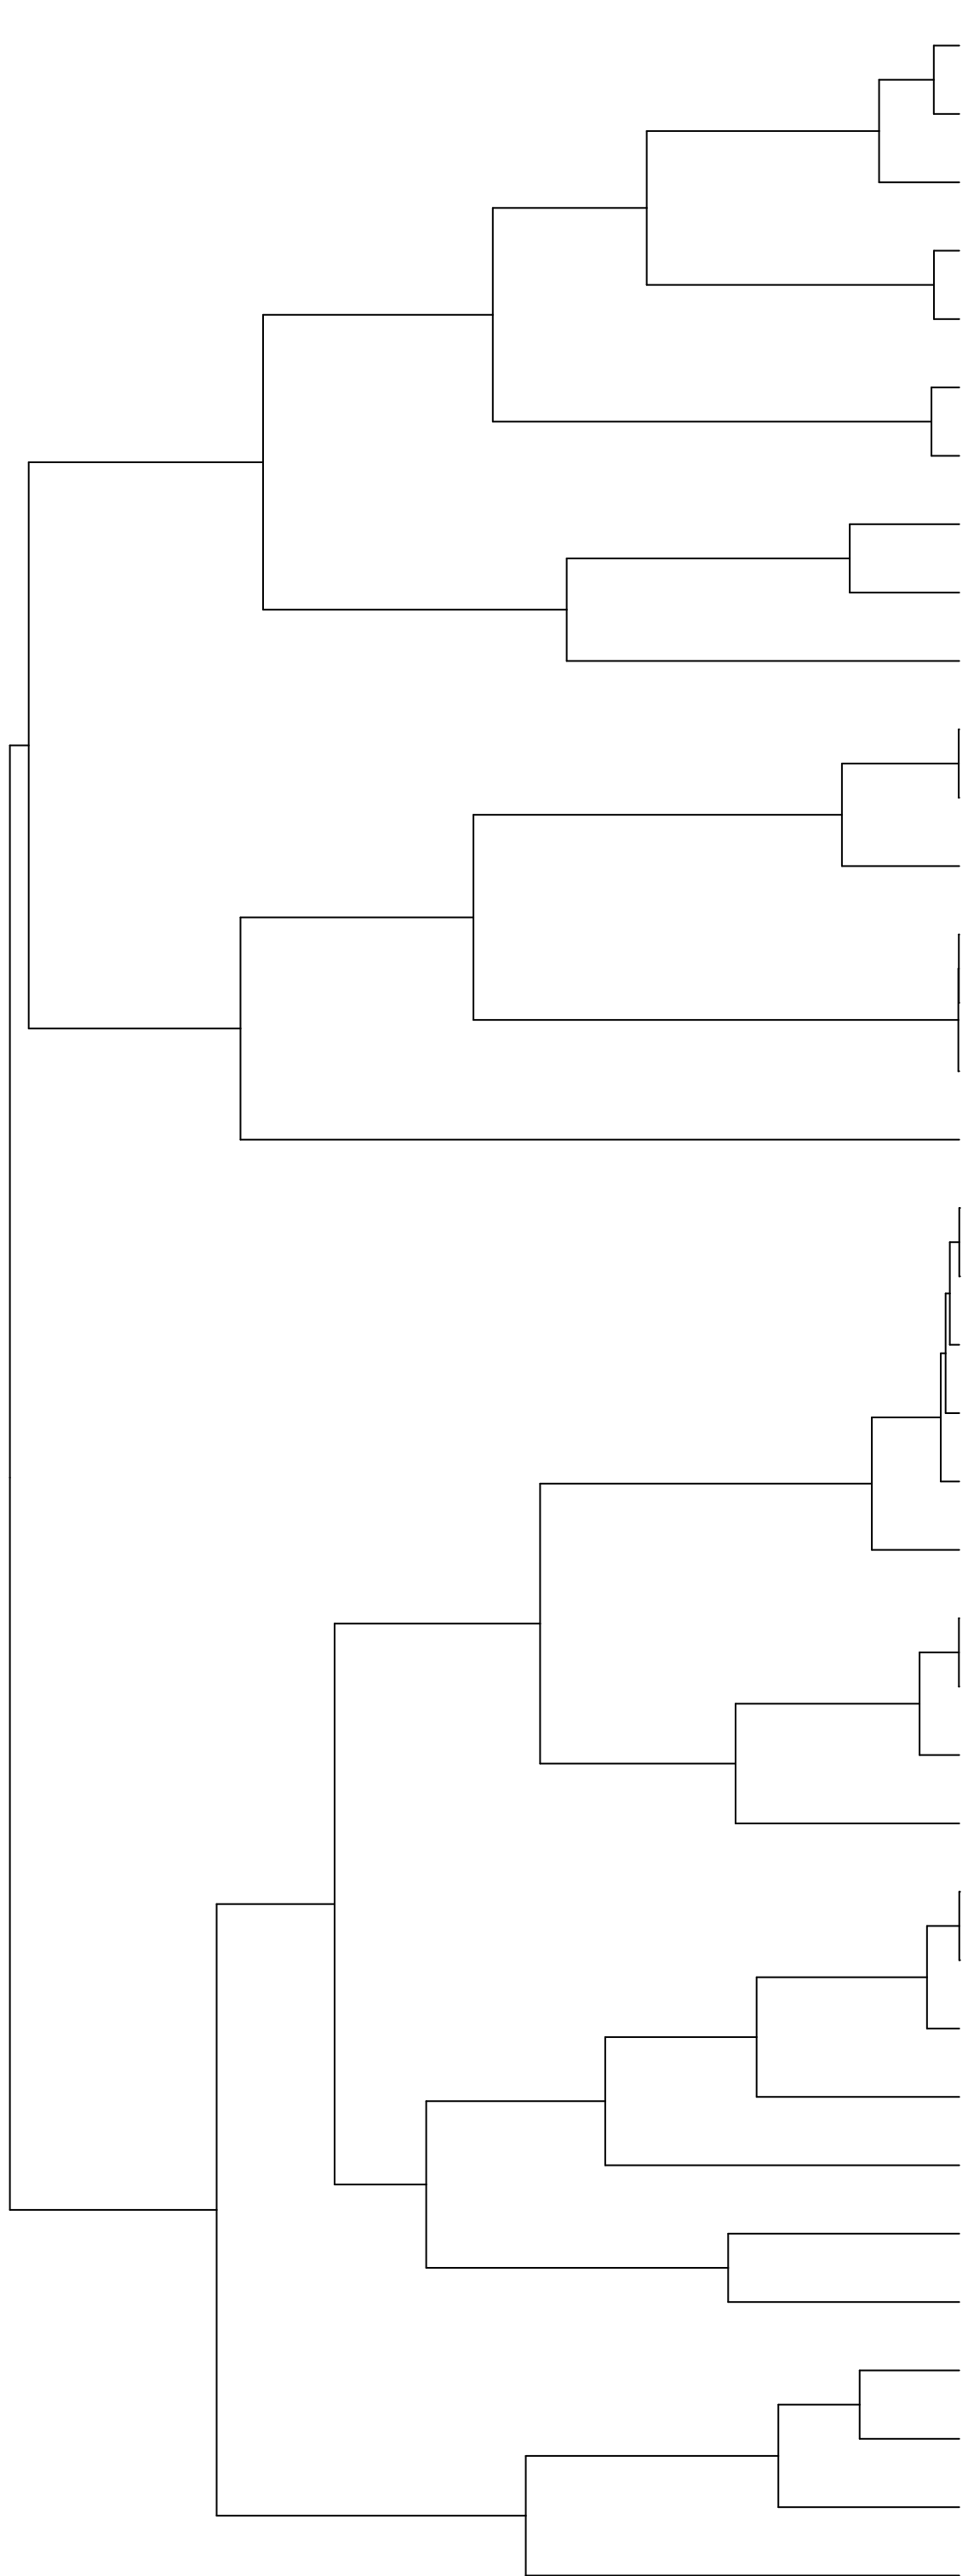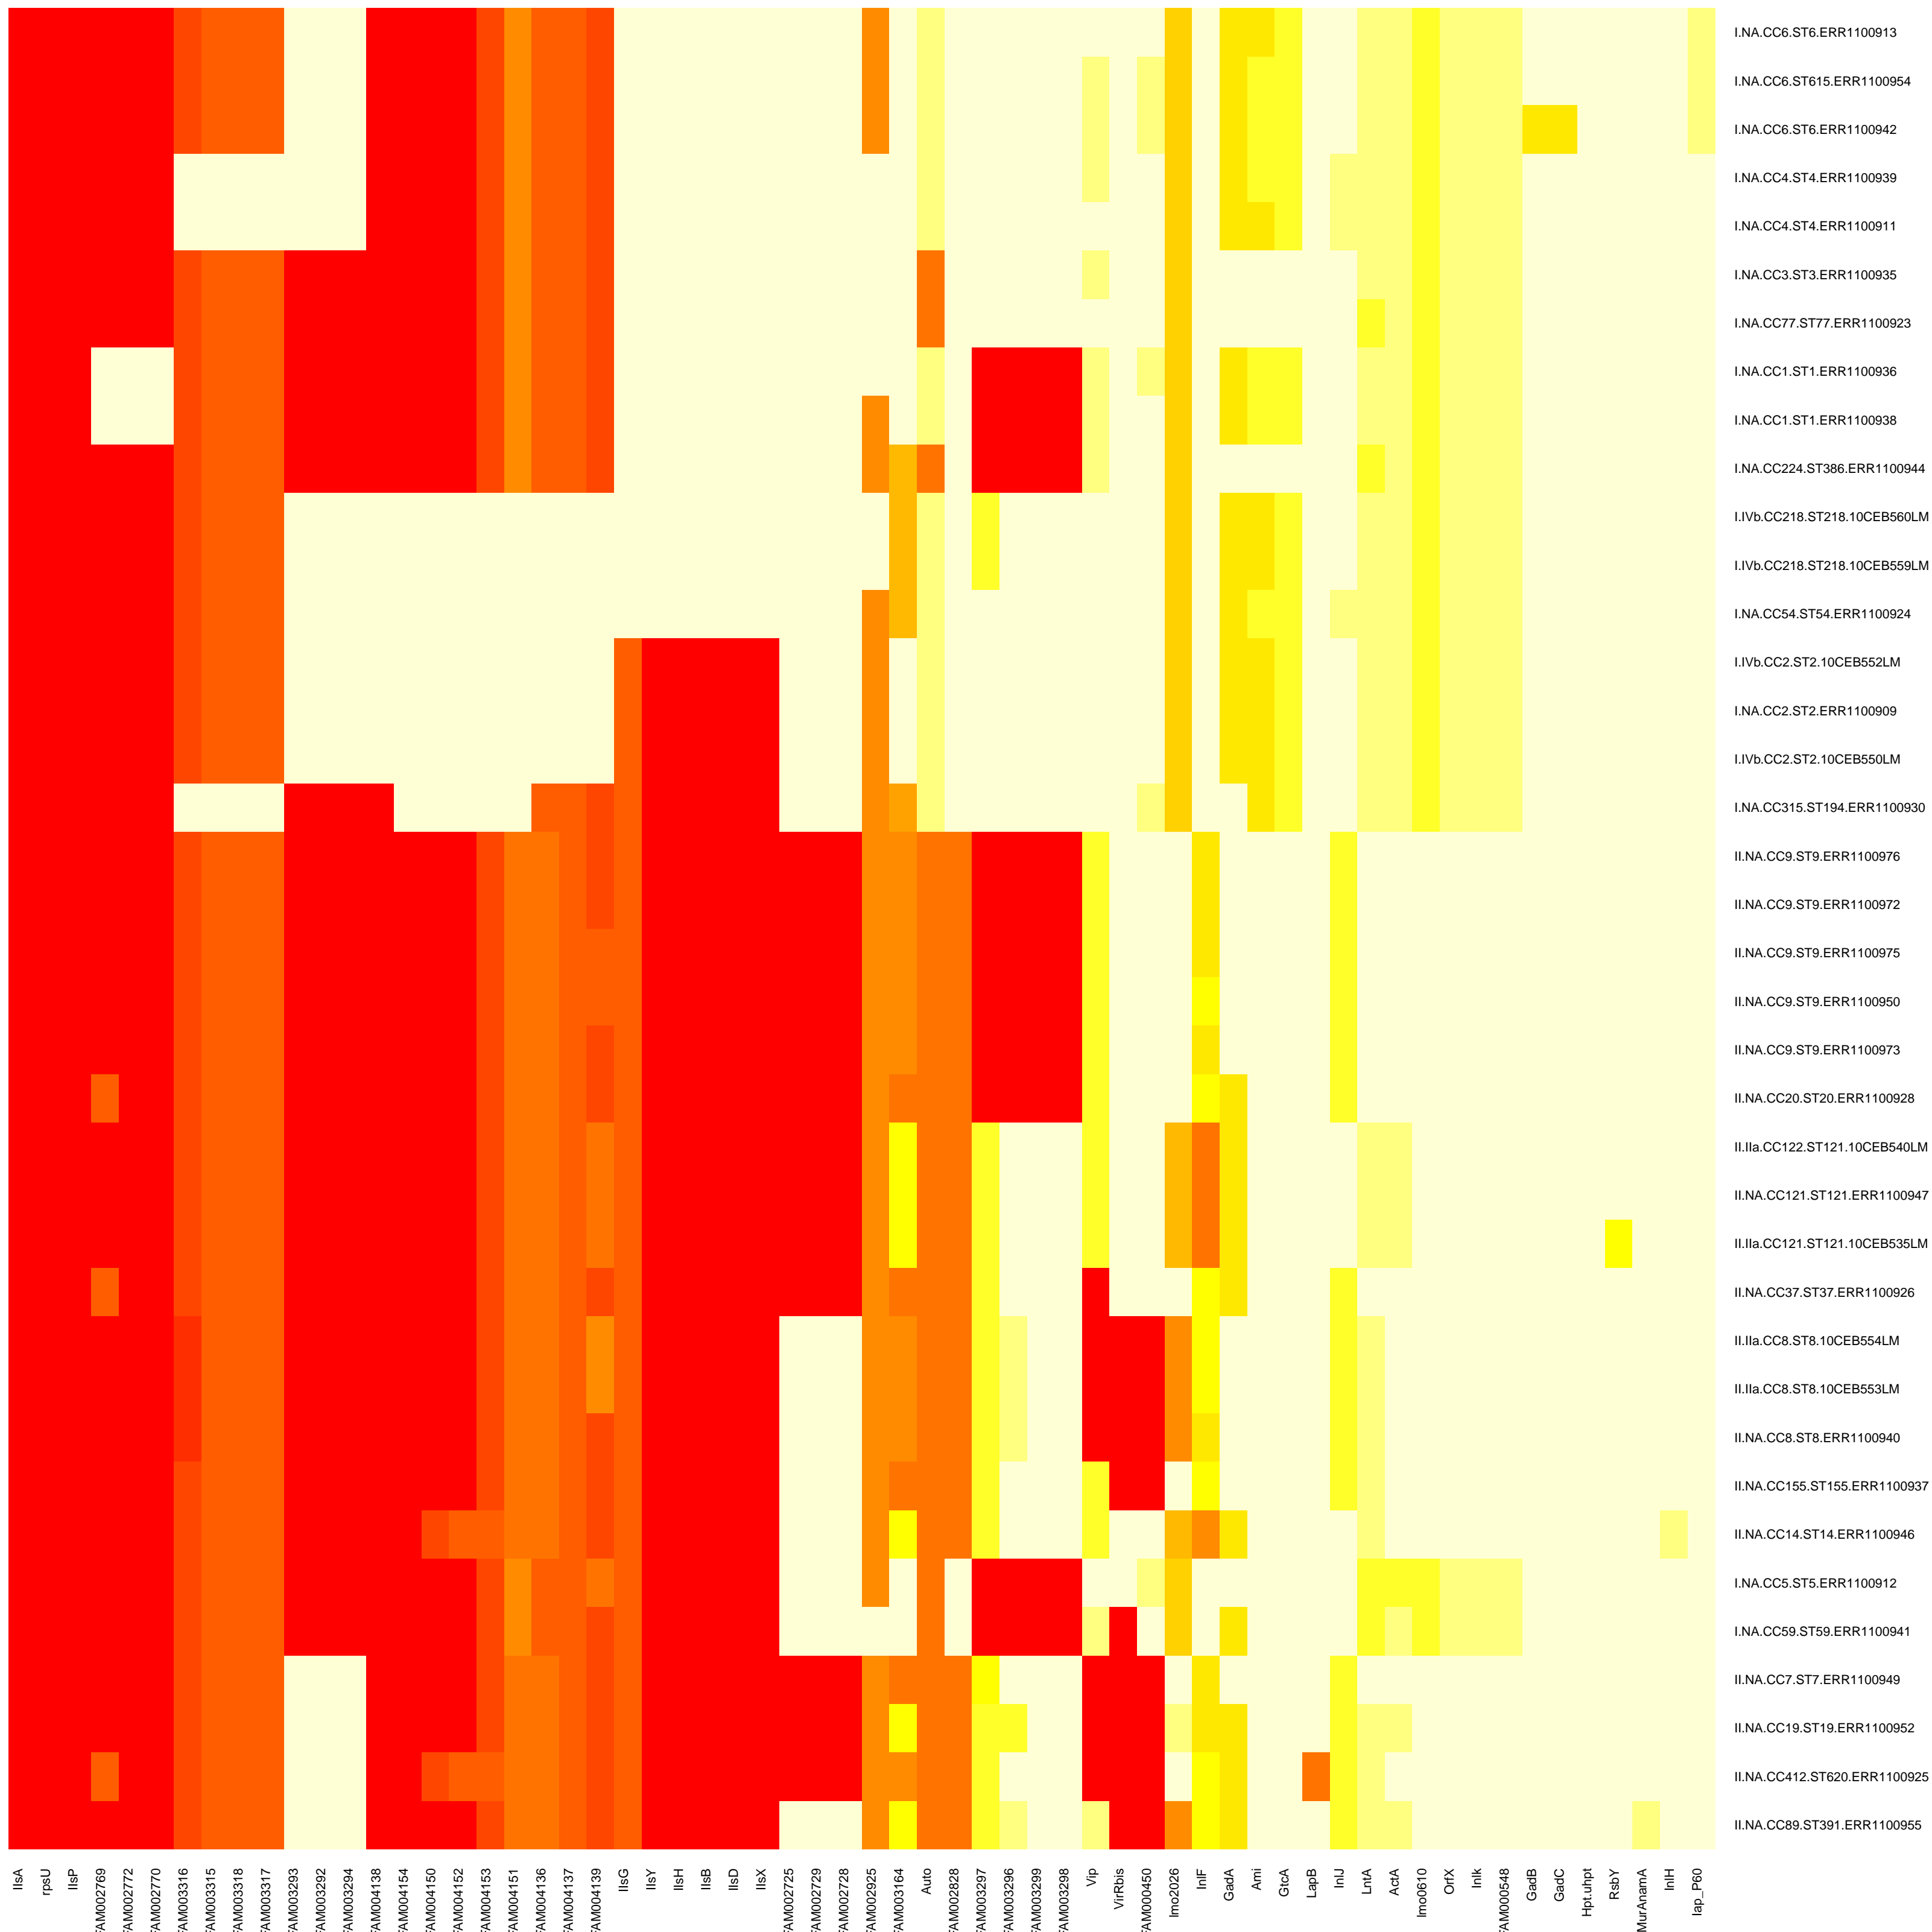

Supplement: RISA-39-1397-s003.pdf [file RISA-39-1397-s003.pdf]
